# Psychiatric Services

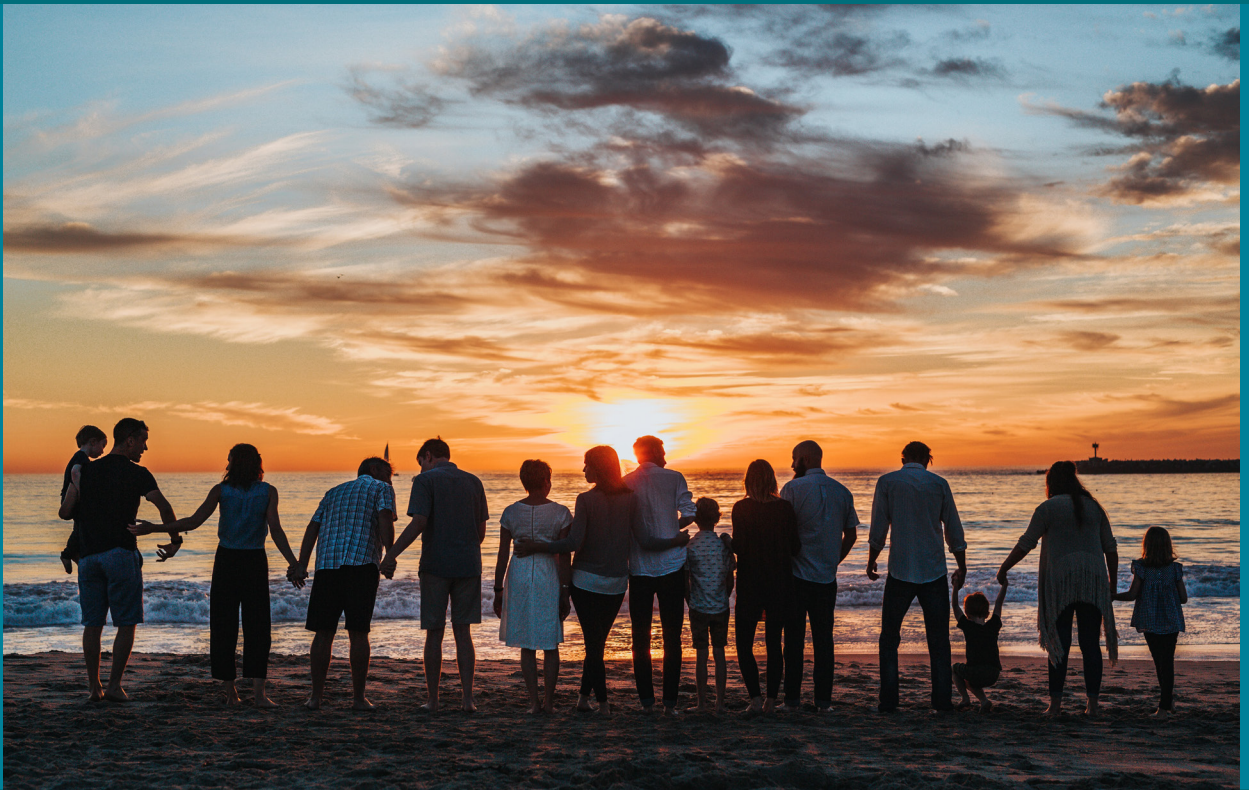

Two reports on the benefits of family involvement

Teasing out the research on extreme risk protection orders

Behavioral economics as a strategy to improve medication adherence

Personal Accounts: E. Fuller Torrey looks back on his career
